# Supplementary material
Source: Research Square preprint supplement (doi:10.21203/rs.3.rs-9709270/v1)
Supplement: Supplementary file 1 [file 708c0da826b921bfff82eac3.docx]

**Appendix**


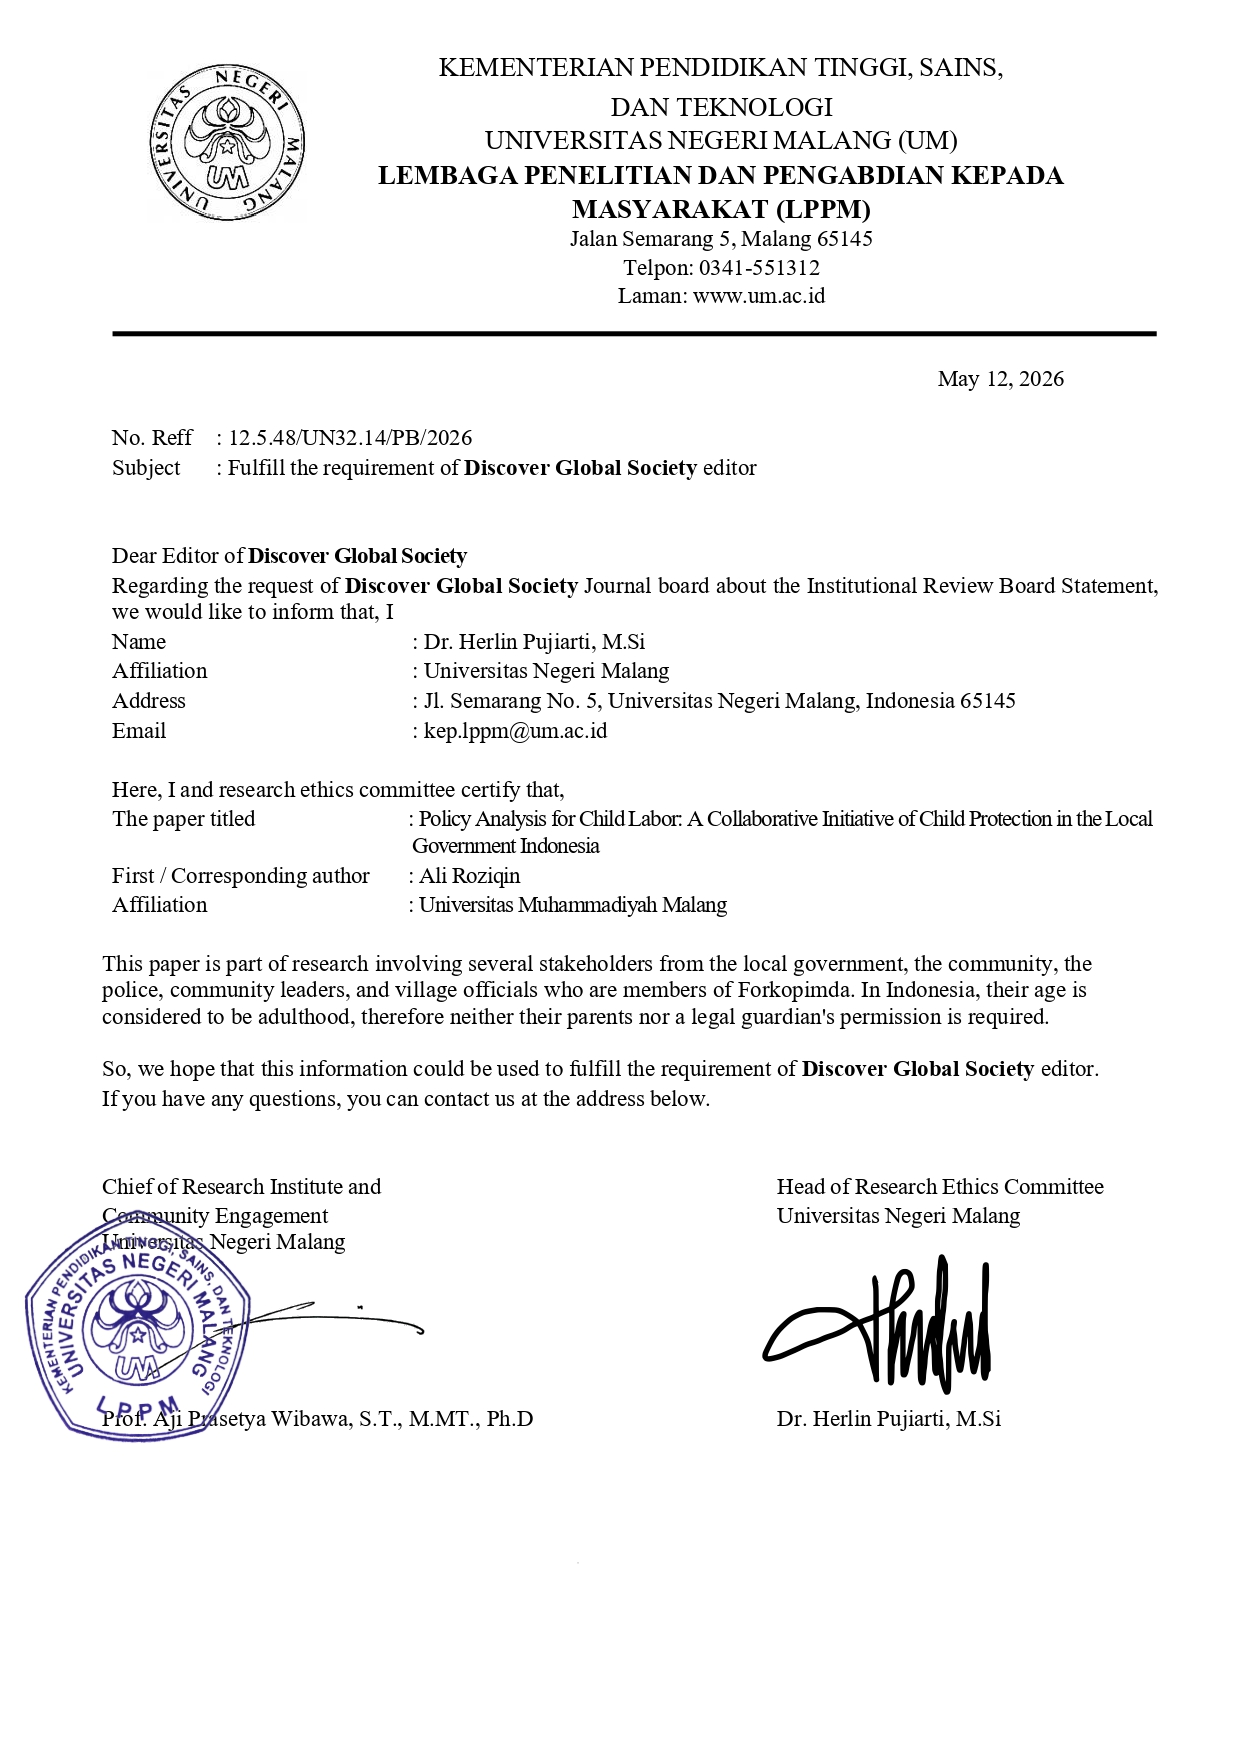


**Appendix**

**Table 1. The characteristics of participations in the study**

| **Stakeholder’s name** | **Code** | **Participation’s Level** | **Organizational Level** | **Sector** | **Related role** |
| --- | --- | --- | --- | --- | --- |
| Regional Representatives Council of Central Java | P1 | Policymaker at regional level | Regional | Governmental | Building better regulation, coordination, and communication between stakeholders for regional law |
| Regional Secretary | P2 | Regional Coordinator | Regional | Governmental | Establish better coordination and communication between stakeholders and organizations |
| Local Representatives Council of Brebes | P3 | Policymaker at regional level | Regional | Governmental | Building better regulation, coordination, and communication between stakeholders for regional law |
| Office of Education, Youth, and Sport Services | P4 | Main Agencies | Regional | Governmental | Implementing education policies, including back-to-school programs to prevent dropouts and human resource training. |
| Office of Public Health Services | P5 | Supporting Agency | Regional | Governmental | Providing public health services and overseeing occupational safety regulations |
| Office of Social Work | P6 | Supporting Agency | Regional | Governmental | Providing programs to improve human resource capacity |
| Office of Community Empowerment and Village | P7 | Supporting Agency | Regional | Governmental | Empowering rural communities, including poverty alleviation programs |
| Office of Women’s Empowerment, Child Protection and Family | P8 | Supporting Agency | Regional | Governmental | Empowering communities, including women empowerment, child protection and poor families. |
| Office of Trade, Cooperative, and SMEs | P9 | Supporting Agency | Regional | Governmental | Providing informal employment and implementing employment regulations, including preventing child labor. |
| Office of Industry and Manpower | P10 | Technical support agencies | Regional | Governmental | Providing formal employment and monitoring regulations and employment, including preventing child labor. |
| Office of Regional Development Planning | P11 | Regional development coordinator | Regional | Governmental | Regional development planning, including education and social programs. |
| The Municipal Police Unit | P12 | Supporting Agency | Regional | Governmental | Enforce local regulations, including prohibitions on child labor. |
| The Ministry of Education | P13 | Policymaker and funder | National | Governmental | Building better regulation, coordination, and communication between stakeholders for dropout prevention and inclusive education, School Operational Assistance and affirmative programs for dropout-prone areas. |
| The Ministry of Public Health | P14 | Policymaker | National | Governmental | Building better regulation, coordination, and communication between stakeholders for policies in the occupational health and safety sector |
| The Ministry of Social Affairs | P15 | Supporting agencies | National | Governmental | Providing social protection programs for poor families and vulnerable children through social assistance programs and rehabilitation of children who are victims of economic exploitation. |
| The Ministry of Manpower | P16 | Regulator and facilitator | National | Governmental | Building better regulation, coordination, and communication between stakeholders for prohibition of child labor, workplace supervision and vocational training programs for those of legal working age. |
| The Ministry of Industry and Business Affairs | P17 | Policymaker | National | Governmental | Building better regulation, coordination, and communication between stakeholders to develop child-friendly industries and empowerment of MSMEs to reduce dependence on child labor. |
| The Ministry of Women’s Empowerment and Child Protection | P18 | Policymaker | National | Governmental | Building better regulation, coordination, and communication between stakeholders for improving human resource capacity, woman and child protection |
| The Ministry of Human Development and Culture | P19 | Policymaker | National | Governmental | Building better regulation, coordination, and communication between stakeholders for developing human capacity and local wisdom |
| The Ministry of National Development Planning | P20 | National development coordinator | National | Governmental | Building better regulation, coordination, and communication between stakeholders for strategic development planning |
| Southeast Asian Ministers of Education Organization (SEAMEO) | P21 | Technical Facilitator | International | Non-Governmental | Developing an open education system, including hybrid learning, to provide wider access to education for school children in Southeast Asia. |
| United Nations Educational, Scientific and Cultural Organization (UNESCO) | P22 | Technical Facilitator | International | Non-Governmental | Advancing inclusive and quality education. |
| United Nations International Children's Emergency Fund (UNICEF) | P23 | Advocate and funder | International | Non-Governmental | Providing funding assistance for the Child-Friendly Schools program, conducting campaigns on the dangers of child labor and the importance of education, and strengthening the reporting and rehabilitation system for children forced to work. |
